# Supplementary material for: Integrative Approach to Identifying System-Level Mechanisms of Chung-Sang-Bo-Ha-Hwan’s Influence on Respiratory Tract Diseases: A Network Pharmacological Analysis with Experimental Validation
Source: MDPI journal article supplement (doi:10.3390/plants12173024), 2023-08-22
Supplement: s1 [file s1]

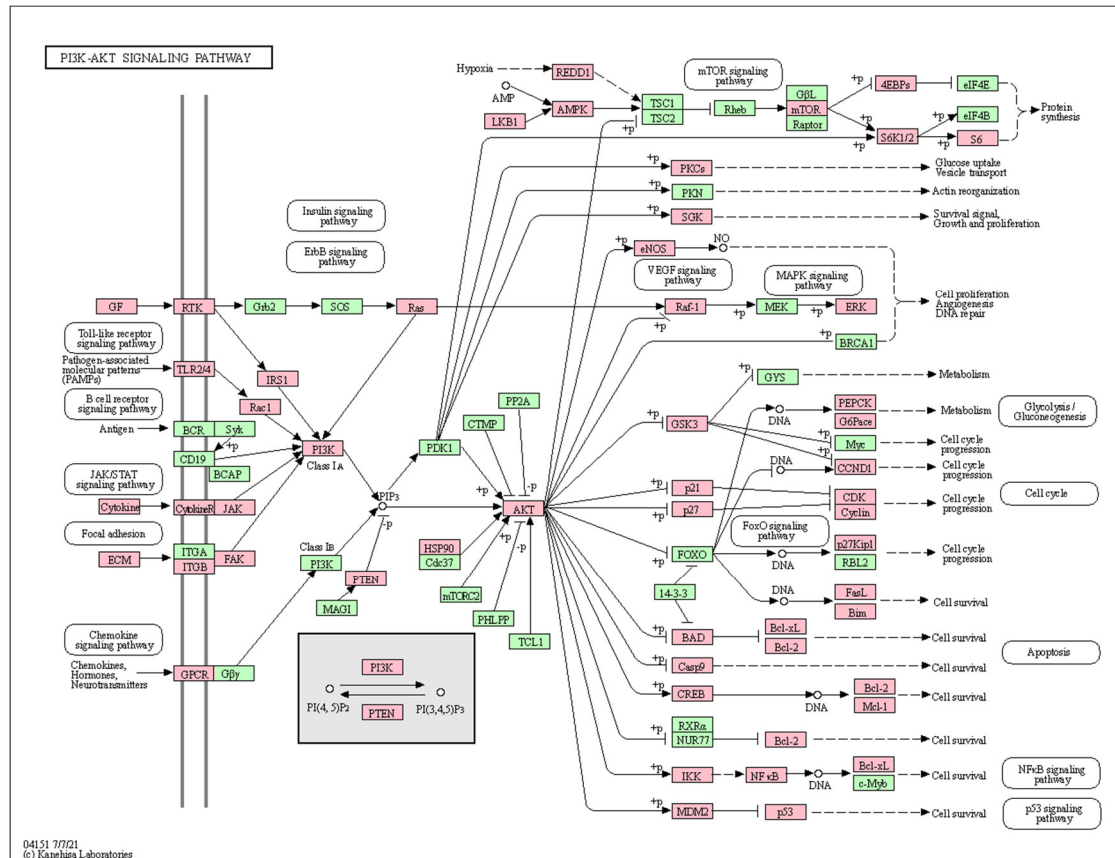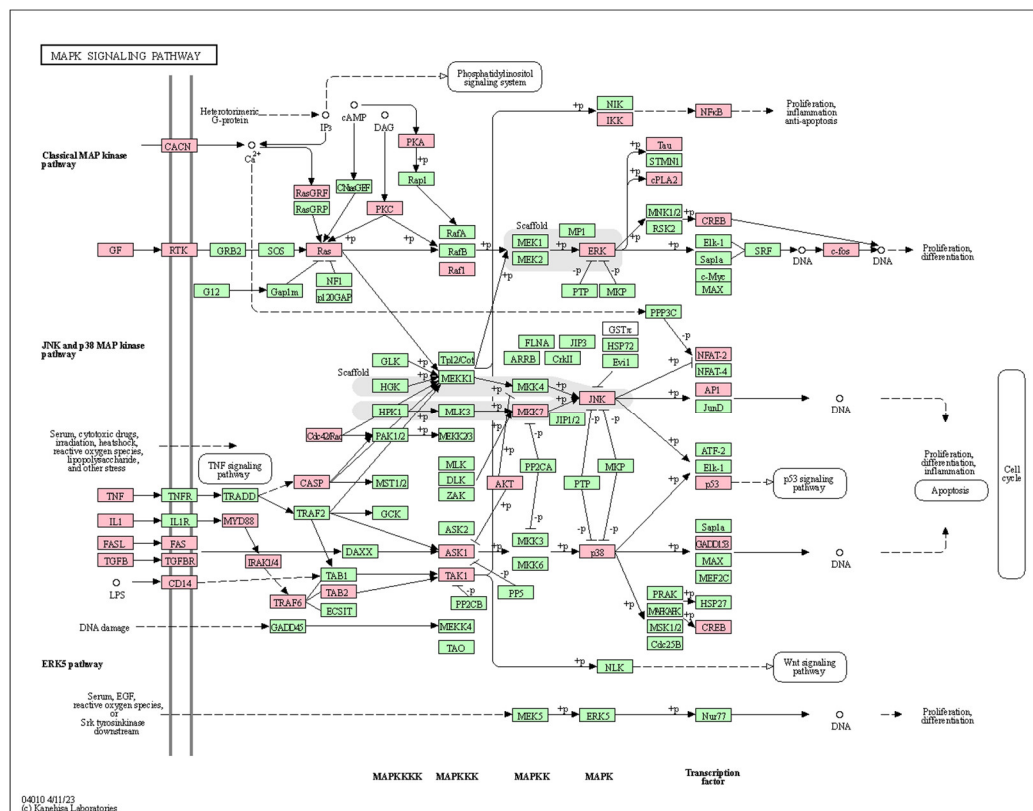

**Figure S1.** Signaling pathways and targets of CSBH. The pathway maps were constructed using KEGG mapper. The pink-colored box represents a predicted target gene to interact with CSBH.

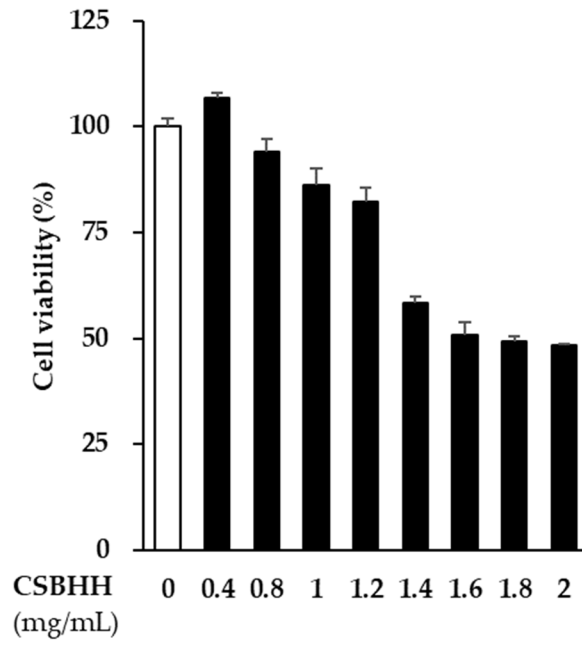

**Figure S2.** Effect of Chung-Sang-Bo-Ha-Hwan (CSBHH) on NCI-H292 cell viability. The cells ( $2 \times 10^4$  cells/well) were cultured in a 96-well plate for 24 h. Thereafter, the cells were treated with a specific CSBHH concentration for 24 h. Cell viability was determined using an Ez-Cytox kit. Data are presented as the mean  $\pm$  SEM (n=3).

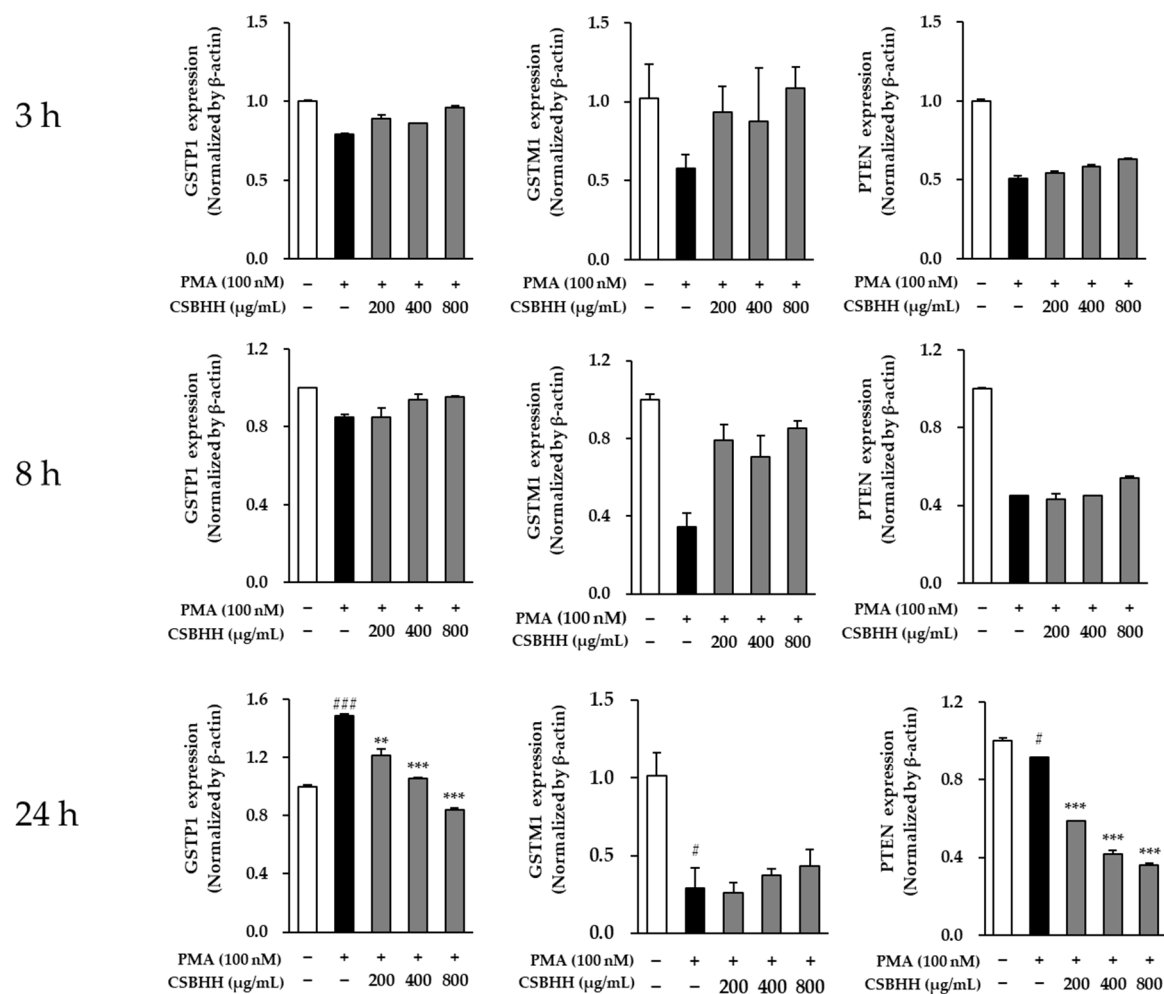

**Figure S3.** Effect of Chung-Sang-Bo-Ha-Hwan (CSBHH) on phorbol 12-myristate 13-acetate (PMA)-induced GSTP1, GSTM1, and PTEN mRNA expression in NCI-H292 cells. mRNA expression was assessed by qRT-PCR analysis. Data are presented as the mean  $\pm$  SEM ( $n = 2$ ). #  $p < 0.05$  and ###  $p < 0.001$  compared with the untreated cells; \*\* $p < 0.01$  and \*\*\* $p < 0.001$  compared with the PMA-treated cells.
